# Supplementary material for: Ancient allopolyploidy and specific subgenomic evolution drive adaptive radiation in poplars and willows
Source: Research Square preprint supplement (doi:10.21203/rs.3.rs-5852798/v1), 2025-01-28
Supplement: Supplementary file 1 [file 36b8183ee774541219c57414.xlsx]

## Sheet: Supp Table 1
Supplementary Table 1. The statistics of subfamilies, tribes, and genera included in the Salicaceae, with genera used in this study highlighted in red.
Subfamily	Tribe	Genus	Sequenced in this study
Samydoideae	/	Casearia	Nanopore for comparative genomic analysis
		Piparea	/
		Euceraea	/
		Irenodendron	/
		Lunania	/
		Neoptychocarpus	/
		Ophiobotrys	/
		Osmelia	/
		Pseudosmelia	/
		Ryania	/
		Tetrathylacium	/
		Trichostephanus	/
Scyphostegioideae	/	Dianyuea	HiFi for parental lineage identification
		Scyphostegia	/
Salicoideae	Homalieae	Homalium	Illumina for parental lineage identification
		Bartholomaea	/
		Bivinia	/
		Byrsanthus	/
		Calantica	/
		Dissomeria	/
		Trimeria	/
		Neopringlea	/
	Bembicieae	Bembicia	/
	Prockieae	Banara	Illumina for parental lineage identification
		Prockia	Illumina for parental lineage identification
		Hasseltia	/
		Hasseltiopsis	/
		Macrohasseltia	/
		Pineda	/
		Pleuranthodendron	/
		Neosprucea	/
		Ahernia	/
	Abatieae	Abatia	/
		Aphaerema	/
	Scolopieae	Scolopia	Nanopore for comparative genomic analysis
		Hemiscolopia	/
		Mocquerysia	/
		Phyllobotryon	/
		Pseudoscolopia	/
	Saliceae	Salix	Nanopore for comparative genomic analysis
		Dovyalis	Nanopore for comparative genomic analysis
		Flacourtia	Nanopore for comparative genomic analysis
		Idesia	Nanopore for comparative genomic analysis
		Itoa	Nanopore for comparative genomic analysis
		Xylosma	Nanopore for comparative genomic analysis
		Populus	Published for comparative genomic analysis
		Azara	Illumina for parental lineage identification
		Lasiochlamys	/
		Ludia	/
		Bennettiodendron	/
		Carrierea	/
		Olmediella	/
		Poliothyrsis	/
		Priamosia	/
		Oncoba	/
		Tisonia	/

## Sheet: Supp Table 2
Supplementary Table 2. Sequencing and assembly statistics of the eight Salicaceae reference genomes.
Item	﻿Casearia decandra	﻿Dovyalis caffra	Scolopia chinensis	Xylosma longifolia	Flacourtia jangomas	Itoa orientalis	Idesia polycarpa	Salix rehderiana
Illumination reads (G)	26.17	33.97	24.43	26.08	20.4	40.84	110.38	56.62
Nanopore reads (G)	74.73	48.62	66.93	42.98	96.87	55.26	147.89	69.46
Hi-C reads (G)	88.91	130.89	94.1	95.77	91.03	147.3	143.86	94.73
Assembly Size (bp)	352041455	428294934	273505887	330783903	377420804	588125540	1214341646	377403294
Number of scaffolds	49	30	86	21	96	23	40	273
Longest Scaffold (bp)	41831858	68497925	29020044	57453985	56871444	36300850	92776253	34289461
N50 of scaffold (bp)	25336663	46986673	23219947	36308262	42920011	28853193	60201637	17322241
Numner of contigs	161	92	100	80	216	38	477	541
Longest contig (bp)	24109749	34824929	24533792	28610575	22500000	36300850	55433903	9277014
N50 of contigs (bp)	7162171	18513407	16529210	14031487	7881285	27456812	13020493	3968208
Number of N	56000	31000	7000	29500	60000	7500	43700	125891
Number of chromosomes	11	9	11	10	10	20	21	19
Anchor sequence rate (%)	91.18	97.9	93.69	99.47	93.38	99.93	98.85	88.42

## Sheet: Supp Table 3
Supplementary Table 3. Gene annotation statistics of eight species genomes.
Item	﻿Casearia decandra	﻿Dovyalis caffra	Scolopia chinensis	Xylosma longifolia	Flacourtia jangomas	Itoa orientalis	Idesia polycarpa	Salix rehderiana
Gene number	22874	20859	21369	21531	23435	29058	37661	28339
Exons per gene	5.72323	6.02306	6.14207	5.92611	5.89111	5.92935	5.8	5.96754
Average length of gene	3569.02	3753.85	3944.66	3765.65	3816.83	3714.42	8483.96	3712.22
Average length of cds	245.489	233.454	231.513	233.937	234.888	234.748	220.1	228.212
Average length of exon	311.606	292.162	310.821	299.005	312.536	290.78	220.1	287.744
Aaverage length of intron	394.388	410.517	411.182	417.533	420.813	420.352	1500.77	416.257

## Sheet: Supp Table 4
Supplementary Table 4. Quality assessment of genome assembly and annotation for eight species.
	Type	﻿Casearia decandra	﻿Dovyalis caffra	Scolopia chinensis	Xylosma longifolia	Flacourtia jangomas	Itoa orientalis	Idesia polycarpa	Salix rehderiana
Genome assembly	Complete BUSCOs (C)	1,330 (96.7)	1,342 (97.6)	1,343 (97.7)	1,338 (97.3)	1,343 (97.6)	1,346 (97.9)	1,316 (95.7)	1,304 (94.9)
	Complete and single-copy BUSCOs (S)	1,287 (93.6)	1,329 (96.7)	1,284 (93.4)	1,325 (96.4)	1,297 (94.3)	1,173 (85.3)	980 (71.3)	1,145 (83.3)
	Complete and duplicated BUSCOs (D)	43 (3.1)	13 (0.9)	59 (4.3)	13 (0.9)	46 (3.3)	173 (12.6)	336 (24.4)	159 (11.6)
	Fragmented BUSCOs (F)	14 (1.0)	7 (0.5)	7 (0.5)	11 (0.8)	10 (0.7)	8 (0.6)	12 (0.9)	34 (2.5)
	Missing BUSCOs (M)	31 (2.3)	26 (1.9)	25 (1.8)	26 (1.9)	22 (1.7)	21 (1.5)	47 (3.4)	37 (2.6)
	Total BUSCO groups searched	1,375 (100.0)	1,375 (100.0)	1,375 (100.0)	1,375 (100.0)	1,375 (100.0)	1,375 (100.0)	1,375 (100.0)	1,375 (100.0)
Genome annotation	Complete BUSCOs (C)	1,310 (95.3)	1,338 (97.3)	1,335 (97.1)	1,319 (96.0)	1,324 (96.3)	1,350 (98.2)	1,313 (95.5)	1,303 (94.7)
	Complete and single-copy BUSCOs (S)	1,266 (92.1)	1,325 (96.4)	1,286 (93.5)	1,299 (94.5)	1,270 (92.4)	1,184 (86.1)	987 (71.8)	1,147 (83.4)
	Complete and duplicated BUSCOs (D)	44 (3.2)	13 (0.9)	49 (3.6)	20 (1.5)	54 (3.9)	166 (12.1)	326 (23.7)	156 (11.3)
	Fragmented BUSCOs (F)	25 (1.8)	12 (0.9)	11 (0.8)	21 (1.5)	18 (1.3)	4 (0.3)	28 (2.0)	40 (2.9)
	Missing BUSCOs (M)	40 (2.9)	25 (1.8)	29 (2.1)	35 (2.5)	33 (2.4)	21 (1.5)	34 (2.5)	32 (2.4)
	Total BUSCO groups searched	1,375 (100.0)	1,375 (100.0)	1,375 (100.0)	1,375 (100.0)	1,375 (100.0)	1,375 (100.0)	1,375 (100.0)	1,375 (100.0)

## Sheet: Supp Table 5
Supplementary Table 5. Prediction and comparison of repetitive elements in Salicaceae species.
	﻿Casearia decandra		﻿Dovyalis caffra		Scolopia chinensis		Xylosma longifolia		Flacourtia jangomas		Itoa orientalis		Idesia polycarpa		Populus euphratica		Populus trichocarpa		Populus alba var. pyramidalis		Salix chaenomeloides		Salix purpurea		Salix rehderiana
	Length (bp)	% of Genome	Length (bp)	% of Genome	Length (bp)	% of Genome	Length (bp)	% of Genome	Length (bp)	% of Genome	Length (bp)	% of Genome	Length (bp)	% of Genome	Length (bp)	% of Genome	Length (bp)	% of Genome	Length (bp)	% of Genome	Length (bp)	% of Genome	Length (bp)	% of Genome	Length (bp)	% of Genome
DNA	9107402	2.59	14830444	3.46	7216331	2.64	15590887	4.71	19234962	5.1	25010833	4.25	43139372	3.55	15462319	2.69	23606347	5.44	18828038	4.61	8699378	2.6	7211905	2.3	9008863	2.39
LINE	6167808	1.75	3548633	0.83	2182305	0.8	3873461	1.17	5430956	1.44	4337986	0.74	11714034	0.96	3426712	0.6	3256582	0.75	3477728	0.85	1459365	0.44	3845599	1.23	2479430	0.66
SINE	450789	0.13	235400	0.05	899019	0.33	362996	0.11	1000881	0.27	1462965	0.25	910924	0.08	1490182	0.26	1764310	0.41	1467929	0.36	3182145	0.95	2946128	0.94	2328242	0.62
LTR	1478771	0.42	2354741	0.55	1437093	0.53	6406643	1.94	4090194	1.08	4080858	0.69	6224521	0.51	768047	0.13	821965	0.19	628417	0.15	455388	0.14	414545	0.13	413469	0.11
LTR/Copia	18950823	5.38	37329306	8.72	9600704	3.51	17186741	5.2	21033628	5.57	39293641	6.68	111050714	9.14	16385626	2.85	18044028	4.16	17083091	4.19	15128051	4.51	20106845	6.41	23456387	6.22
LTR/Gypsy	25719544	7.31	41562301	9.7	20998882	7.68	32181528	9.73	28169135	7.46	84256025	14.33	326736049	26.91	207707337	36.16	52831134	12.17	50652939	12.41	25850216	7.71	23333644	7.44	27130888	7.19
RC	3228926	0.92	698388	0.16	2810497	1.03	845182	0.26	3820912	1.01	18571521	3.16	29998494	2.47	14842446	2.58	20299024	4.68	15168162	3.72	9279588	2.77	10746410	3.43	11625305	3.08
Simple_repeat	9056987	2.57	9816329	2.29	6026668	2.2	5952795	1.8	7962801	2.11	8812661	1.5	15836744	1.3	8400676	1.46	7795109	1.8	6066135	1.49	6472243	1.93	7080116	2.26	7916660	2.1
Low_complexity	2158736	0.61	4206625	0.98	1189357	0.43	1269077	0.38	1553753	0.41	2296010	0.39	3028866	0.25	1777901	0.31	1549914	0.36	1635406	0.4	1640198	0.49	1408616	0.45	1503939	0.4
Satellite	12471	0	6220611	1.45	71905	0.03	0	0	42721	0.01	39683	0.01	220496	0.02	15917	0	214169	0.05	430357	0.11	0	0	48954	0.02	25902	0.01
tRNA	19732	0.01	30485	0.01	25026	0.01	28023	0.01	25048	0.01	35023	0.01	0	0	31441	0.01	31044	0.01	25810	0.01	36079	0.01	22693	0.01	21707	0.01
rRNA	292334	0.08	619273	0.14	298471	0.11	439005	0.13	357942	0.09	206968	0.04	0	0	296122	0.05	165423	0.04	51197	0.01	83943	0.03	348561	0.11	542395	0.14
snRNA	3859	0	8612	0	7536	0	9692	0	3389	0	6941	0	0	0	3924	0	4667	0	4186	0	11487	0	2744	0	2742	0
Unknown	56850372	16.15	84784181	19.8	34491541	12.61	44505606	13.45	42479920	11.26	69049018	11.74	167623978	13.8	22211097	3.87	28165760	6.49	28227790	6.92	14933399	4.46	20991396	6.69	63939678	16.94
Total	133498554	37.92	206245329	48.15	87255335	31.9	128651636	38.89	135206242	35.82	257460133	43.78	716484192	59	292819747	50.98	158552104	36.52	143747185	35.23	87231480	26.03	98508156	31.41	150395607	39.85

## Sheet: Supp Table 6
Supplementary Table 6. The relative contribution and importance of environmental variables used for each branch in the Maxent model.
Genus	BIO1	BIO2	BIO3	BIO4	BIO5	BIO6	BIO7	BIO8	BIO9	BIO10	BIO11	BIO12	BIO13	BIO14	BIO15	BIO16	BIO17	BIO18	BIO19
Salix	--	--	--	--	19.4 / 41.2	--	--	--	--	--	22.8 / 27.8	--	--	47 / 1.1	--	7.2 / 9.4	--	0.3 / 7.4	3.3 / 13.1
Populus	--	--	4.6 / 3.3	--	15 / 27.9	--	--	--	--	--	32 / 35.1	--	--	41.8 / 3.5	--	--	--	1.1 / 12.2	5.5 / 18
Idesia	--	--	10.6 / 13.6	15.3 / 3.2	--	--	--	--	--	--	--	--	--	--	--	--	--	74.2 / 83.2	--
Itoa	--	5.9 / 11.9	--	--	--	--	--	0.4 / 10.9	--	--	10.7 / 56.6	--	--	--	--	--	--	79.9 / 19.1	3.1 / 1.6
Flacourtia	--	2.4 / 7.2	17.2 / 5.9	--	--	--	--	--	--	--	10.1 / 59.5	1.4 / 7.8	--	--	--	67.6 / 12.4	--	1.2 / 7.2	--
Xylosma	--	--	--	2.1 / 2.6	--	--	--	--	--	1.4 / 3.6	18.3 / 64.8	--	--	4.1 / 7.1	0.5 / 4	61.5 / 9.8	--	10.1 / 3.2	1.9 / 4.9
Scolopia	--	--	--	12.4 / 4.8	5.6 / 10.4	--	--	--	--	--	32.3 / 71.8	5.2 / 3.3	--	4.6 / 2.2	--	--	--	39.9 / 7.3	--
Dovyalis	14.4 / 16.2	1.5 / 1.6	69.5 / 73.7	--	--	--	--	--	--	--	--	10.5 / 6.5	--	4.1 / 1.9	--	--	--	--	--
Casearia	--	--	27.1 / 11	--	--	--	2.2 / 36.2	0.7 / 11.5	--	--	5.6 / 8.6	--	--	4.1 / 6.3	--	59.4 / 20	--	0.4 / 3.1	0.6 / 3.4
Bioclimatic variables are coded as follows:
BIO1 = Annual Mean Temperature
BIO2 = Mean Diurnal Range (Mean of monthly (max temp - min temp))
BIO3 = Isothermality (BIO2/BIO7) (×100)
BIO4 = Temperature Seasonality (standard deviation ×100)
BIO5 = Max Temperature of Warmest Month
BIO6 = Min Temperature of Coldest Month
BIO7 = Temperature Annual Range (BIO5-BIO6)
BIO8 = Mean Temperature of Wettest Quarter
BIO9 = Mean Temperature of Driest Quarter
BIO10 = Mean Temperature of Warmest Quarter
BIO11 = Mean Temperature of Coldest Quarter
BIO12 = Annual Precipitation
BIO13 = Precipitation of Wettest Month
BIO14 = Precipitation of Driest Month
BIO15 = Precipitation Seasonality (Coefficient of Variation)
BIO16 = Precipitation of Wettest Quarter
BIO17 = Precipitation of Driest Quarter
BIO18 = Precipitation of Warmest Quarter
BIO19 = Precipitation of Coldest Quarter

## Sheet: Supp Table 7
Supplementary Table 7. Estimated realized niche overlap (%) between genera with Hellinger's I in bottom of matrix and Schoener’s D displayed in the top matrix.
Genus	Salix	Populus	Idesia	Itoa	Flacourtia	Xylosma	Scolopia	Dovyalis	Casearia
Salix	NA	0.874033	0.198539	0.183972	0.289766	0.397987	0.318572	0.254465	0.438699
Populus	0.988617	NA	0.204356	0.181174	0.254114	0.384543	0.293214	0.226883	0.399961
Idesia	0.466782	0.480461	NA	0.419973	0.180603	0.282186	0.208995	0.0834383	0.233389
Itoa	0.440468	0.468559	0.649285	NA	0.411301	0.429644	0.490654	0.296493	0.393705
Flacourtia	0.586196	0.549727	0.449128	0.702547	NA	0.776137	0.781914	0.671002	0.814374
Xylosma	0.707829	0.6999	0.572511	0.741013	0.940854	NA	0.790495	0.605551	0.873 (0.97)
Scolopia	0.608483	0.582767	0.4785	0.787455	0.943881	0.960305	NA	0.663113	0.765903
Dovyalis	0.535639	0.509684	0.236181	0.54011	0.873671	0.838556	0.880562	NA	0.618786
Casearia	0.771147	0.738898	0.512267	0.701171	0.956745	0.974 (0.02)	0.939371	0.851111	NA
All P-values, except those indicated within parentheses, are less than 0.01.

## Sheet: Supp Table 8
Supplementary Table 8. Summary of the sequencing, assembly and annotation of additional five Salicaceae genomes.
Item	Azara serrata	Prockia crucis	Banara guianensis	Homalium cochinchinense	Dianyuea turbinata
Illumination reads (G)	26.39	26.21	27.06	25.61	--
Hifi reads (G)	--	--	--	--	189.52
Assembly Size (bp)	424780405	438827005	435246330	317238641	4267003158
Number of scaffolds	301416	372063	184118	184522	--
Longest Scaffold (bp)	101652	124045	212763	215679	--
N50 of scaffold (bp)	8771	7235	23797	13057	--
Numner of contigs	341412	403627	225897	221345	2058
Longest contig (bp)	67764	82725	135511	111531	90407593
N50 of contigs (bp)	5333	4940	9526	5915	17137874
Number of N	6965118	7396288	8549865	6940228	--
BUSCO of assembly (%)	89	84.4	92.9	88.6	95.8
Gene number	29113	31253	24116	23634	44625

## Sheet: Supp Table 9
Supplementary Table 9. Statistics of the transcriptome and epigenetic data used in this study.
The data used in the three analyzes are shown as: 1) Intraspecific subgenome dominance, 2) interspecific subgenome expression divergence, 3) flowering genes (FT1/FT2).
Species	Tissue	Sequencing Type	Data Size (Gb)	Analysis	Source
Salix rehderiana	Leaf	RNA-Seq	6.3	1) Intraspecific subgenome dominance	Minya Konka, Sichuan
			6.6
			7
		ATAC-Seq	23.9
			33.2
		WGBS	23.1
			25.3
Salix purpurea	Leaf	RNA-Seq	11.8		SRR6942606
			14.8		SRR6942585
			11.2		SRR6942586
Salix chaenomeloides	Leaf	RNA-Seq	13.6		Hanzhong, Shanxi
			12.6
			13.5
		WGBS	23.1
			24
Populus alba var. pyramidalis	Leaf	RNA-Seq	6.2		Lanzhou, Gansu
			6.2
		ATAC-Seq	23.9
			24.4
		WGBS	15.3
			20.2
			15.1
Populus trichocarpa	Leaf	RNA-Seq	3.2		SRR7495386
			3.8		SRR7495382
			2.8		SRR7495380
Populus euphratica	Leaf	RNA-Seq	6.4		Lanzhou,Gansu
			6.4
		ATAC-Seq	22
			21.9
			22.1
		WGBS	18.2
			15.4
			17.8
Populu deltoides	Female Flower bud_T2_M6	RNA-Seq	7.7	2) interspecific subgenome expression divergence	SRR11635789
			7.2		SRR11635788
			8.5		SRR11635797
	Female Flower bud_T5_M8	RNA-Seq	7.1		SRR11635796
			6.9		SRR11635795
			7		SRR11635794
	Female Flower bud_T8_M12	RNA-Seq	7.3		SRR11635793
			6.7		SRR11635792
			7.8		SRR11635791
	Female Flower_mature_M3	RNA-Seq	14.4		Chengdu, Sichuan
			17.5
			17.6
	Male Flower bud_T2_M6	RNA-Seq	9		SRR11635790
			9.4		SRR11635787
			9.2		SRR11635786
	Male Flower bud_T5_M8	RNA-Seq	6.8		SRR11635803
			6.8		SRR11635802
			6.7		SRR11635801
	Male Flower bud_T8_M12	RNA-Seq	6.8		SRR11635800
			7.2		SRR11635799
			7.5		SRR11635798
	Male Flower_mature_M3	RNA-Seq	16.7		Chengdu, Sichuan
			15.7
			14.9
	Fruit_early_M3	RNA-Seq	7		Chengdu, Sichuan
			6.2
			6
	Fruit_mid_M3	RNA-Seq	6.1
			6.1
			7.2
	Fruit_late_M4	RNA-Seq	6.2
			6.2
			7.2
	Fruit_mature_M4	RNA-Seq	6.2
			6.2
			7
Idesia polycarpa	Leaf	RNA-Seq	6.2	1) Intraspecific subgenome dominance	Jintang, Chengdu, Sichuan
			6.3
			6.6
		ATAC-Seq	25.3
			20.9
		WGBS	31.2
			35.6
	Female Flower_early_M3	RNA-Seq	7	2) interspecific subgenome expression divergence
			7
			7.2
	Female Flower_mid_M3	RNA-Seq	6.2
			6.1
			6.9
	Female Flower_late_M4	RNA-Seq	7.1
			6.9
			7
	Female Flower_mature_M4	RNA-Seq	7.2
			6.1
			6.1
	Male Flower_early_M3	RNA-Seq	7.1
			7
			7.2
	Male Flower_mid_M3	RNA-Seq	7.2
			6.1
			6.2
	Male Flower_late_M4	RNA-Seq	6.1
			6.1
			7.1
	Male Flower_mature_M4	RNA-Seq	7.1
			6.2
			6.2
	Fruit_early_M4	RNA-Seq	6.2
			6.1
			7
	Fruit_mid_M5	RNA-Seq	8.4
			8
			8.3
	Fruit_late_M7	RNA-Seq	6.2
			6.2
			5.9
	Fruit_mature_M11	RNA-Seq	5.7
			5.8
			6
	Leaf_M3	RNA-Seq	6.8	3) flowering genes (FT1/FT2)
			7.9
	Leaf_M4	RNA-Seq	6.1
			6.3
			6.6
	Leaf_M11	RNA-Seq	6.3
			7.3
	Leaf_M12	RNA-Seq	6.3
			6
	Bud_M1	RNA-Seq	7
			6.3
	Bud_M2	RNA-Seq	7.2
			8.4
	Bud_M11	RNA-Seq	7
			7
	Bud_M12	RNA-Seq	7.6
			6.6
Itoa orientalis	Leaf	RNA-Seq	6.2	1) Intraspecific subgenome dominance	Chengdu, Sichuan
			6.1
			6.3
		ATAC-Seq	21.7
			22.1
		WGBS	33.5
			35
	Female Flower_early_M3	RNA-Seq	7.1	2) interspecific subgenome expression divergence
			7.1
			7.1
	Female Flower_early-mid_M3	RNA-Seq	7.1
			7.1
			7
	Female Flower_mid_M4	RNA-Seq	7.1
			7.1
			7.1
	Female Flower_late_M4	RNA-Seq	7
			7.1
			7.2
	Female Flower_mature_M5	RNA-Seq	7
			7
			7.1
	Male Flower_early_M3	RNA-Seq	7
			7
			7.1
	Male Flower_early-mid_M3	RNA-Seq	7
			7
			7.1
	Male Flower_mid_M4	RNA-Seq	7.1
			7
			7
	Male Flower_late_M4	RNA-Seq	7
			7
			7
	Male Flower_mature_M5	RNA-Seq	7.1
			7
			7
	Fruit_early_M6	RNA-Seq	18.7
			15.6
			17.5
	Fruit_early-mid_M7	RNA-Seq	16.8
			15
			15.9
	Fruit_mid_M8	RNA-Seq	15.4
			13.6
			14.5
	Fruit_mid-late_M9	RNA-Seq	13.1
			12.8
			12.9
	Fruit_late_M10	RNA-Seq	17.3
			21.1
			18.6
	Leaf_M1	RNA-Seq	6.4	3) flowering genes (FT1/FT2)
			6.5
	Leaf_M2	RNA-Seq	8
			6.3
	Leaf_M3	RNA-Seq	6.8
			5.7
	Leaf_M4	RNA-Seq	6.2
			6.2
			6.5
	Leaf_M11	RNA-Seq	7
			6.7
	Leaf_M12	RNA-Seq	6.1
			6.4
	Shoot apex_M1	RNA-Seq	6.6
			5.6
	Shoot apex_M2	RNA-Seq	6.4
			6.7
	Shoot apex_M11	RNA-Seq	6.5
			6.8
	Shoot apex_M12	RNA-Seq	6.6
			6.3
Flacourtia jangomas	Leaf	RNA-Seq	6.1	1) Intraspecific subgenome dominance	XiShuangBanNa Tropical Botanical Garden (Mengla, China)
			6.1
			6.3
		ATAC-Seq	20.3
			24.5
		WGBS	21
			21
Xylosma longifolia	Leaf	RNA-Seq	6.3
			6.3
			6.2
		ATAC-Seq	26.7
			32.1
		WGBS	21.9
			21.9
Scolopia chinensis	Leaf	RNA-Seq	6.3
			6.4
			6.2
		ATAC-Seq	27.5
			19
		WGBS	21
			20.4
Dovyalis caffra	Leaf	RNA-Seq	6.3
			6.3
			6.3
		ATAC-Seq	23.3
			23.7
		WGBS	30.8
			30.3
Casearia decandra	Leaf	RNA-Seq	5.8
			6.3
			6.3
		ATAC-Seq	29.1
			28.3
		WGBS	20.8
			19.9

## Sheet: Supp Table 10
Supplementary Table 10. Gene Ontology enrichment analysis for genes from 15 clusters
Cluster	GO ID	GO Description	Count	GeneRatio	Pvalue	Qvalue
C1	GO:0062012	regulation of small molecule metabolic process	8	0.05	6.66756e-07	5.18092e-05
	GO:0005543	phospholipid binding	9	0.05625	9.62253e-06	0.000432881
	GO:1900424	regulation of defense response to bacterium	8	0.05	2.17557e-05	0.00087539
	GO:1990837	sequence-specific double-stranded DNA binding	10	0.0625	4.05544e-05	0.00132413
	GO:0030010	establishment of cell polarity	6	0.0375	4.11576e-05	0.00132413
	GO:0034605	cellular response to heat	9	0.05625	7.74637e-05	0.00220704
	GO:0002020	protease binding	6	0.0375	0.000105353	0.00281403
	GO:0009863	salicylic acid mediated signaling pathway	8	0.05	0.000135217	0.00321042
	GO:0090351	seedling development	8	0.05	0.000176867	0.00368719
	GO:0048510	regulation of timing of transition from vegetative to reproductive phase	8	0.05	0.000447916	0.00738063
	GO:1901002	positive regulation of response to salt stress	8	0.05	0.000499795	0.00738063
	GO:0042826	histone deacetylase binding	6	0.0375	0.000454645	0.00738063
	GO:0010431	seed maturation	6	0.0375	0.00112012	0.00738063
	GO:0031490	chromatin DNA binding	6	0.0375	0.00132403	0.00762495
	GO:0010252	auxin homeostasis	6	0.0375	0.00152807	0.00803593
	GO:1901141	regulation of lignin biosynthetic process	6	0.0375	0.00158263	0.00803593
	GO:0005976	polysaccharide metabolic process	6	0.0375	0.00217795	0.00926156
	GO:0016055	Wnt signaling pathway	6	0.0375	0.00228555	0.00941645
	GO:0010449	root meristem growth	6	0.0375	0.00235948	0.00941645
	GO:0071472	cellular response to salt stress	6	0.0375	0.00239711	0.00948253
	GO:0019725	cellular homeostasis	6	0.0375	0.0025921	0.00991801
	GO:0019866	organelle inner membrane	6	0.0375	0.00324889	0.0106643
	GO:0048765	root hair cell differentiation	6	0.0375	0.00354367	0.0113233
	GO:0045595	regulation of cell differentiation	7	0.04375	0.00378047	0.0117931
	GO:0032504	multicellular organism reproduction	6	0.0375	0.00402255	0.0119383
	GO:0042659	regulation of cell fate specification	7	0.04375	0.00424715	0.0120633
	GO:0005740	mitochondrial envelope	6	0.0375	0.00724966	0.0160518
	GO:2000377	regulation of reactive oxygen species metabolic process	6	0.0375	0.0106157	0.0192646
	GO:0031348	negative regulation of defense response	6	0.0375	0.0122804	0.0208264
	GO:0010051	xylem and phloem pattern formation	6	0.0375	0.0134429	0.0216796
	GO:0010082	regulation of root meristem growth	6	0.0375	0.0172307	0.0245027
	GO:0009965	leaf morphogenesis	6	0.0375	0.0173896	0.0245273
	GO:0030001	metal ion transport	6	0.0375	0.0185303	0.0255769
	GO:0048585	negative regulation of response to stimulus	6	0.0375	0.0206034	0.0271766
C2	GO:0003333	amino acid transmembrane transport	6	0.0625	4.92689e-07	5.71778e-05
	GO:0010016	shoot system morphogenesis	8	0.0833333	3.50535e-06	0.000203403
	GO:0044419	interspecies interaction between organisms	6	0.0625	5.68675e-06	0.000263436
	GO:0071244	cellular response to carbon dioxide	6	0.0625	6.70133e-06	0.000263436
	GO:0005342	organic acid transmembrane transporter activity	6	0.0625	7.3774e-06	0.000263436
	GO:0046942	carboxylic acid transport	6	0.0625	9.74455e-06	0.000295259
	GO:0015171	amino acid transmembrane transporter activity	6	0.0625	1.46182e-05	0.000329786
	GO:1905039	carboxylic acid transmembrane transport	6	0.0625	1.77041e-05	0.000329786
	GO:0016458	gene silencing	6	0.0625	1.9178e-05	0.000342409
	GO:0016441	posttranscriptional gene silencing	6	0.0625	2.30042e-05	0.000381385
	GO:0006865	amino acid transport	6	0.0625	2.8106e-05	0.000449901
	GO:0009789	positive regulation of abscisic acid-activated signaling pathway	8	0.0833333	3.03479e-05	0.000460642
	GO:0000281	mitotic cytokinesis	8	0.0833333	3.12691e-05	0.000460642
	GO:0031047	gene silencing by RNA	7	0.0729167	4.64694e-05	0.000598112
	GO:1901605	alpha-amino acid metabolic process	6	0.0625	5.01752e-05	0.000612943
	GO:0008514	organic anion transmembrane transporter activity	6	0.0625	0.000102355	0.00113129
	GO:0006520	cellular amino acid metabolic process	7	0.0729167	0.0001456	0.00150198
	GO:0005543	phospholipid binding	6	0.0625	0.000169425	0.00170976
	GO:0040029	regulation of gene expression, epigenetic	6	0.0625	0.000190675	0.00184402
	GO:0008509	anion transmembrane transporter activity	6	0.0625	0.000224625	0.00204458
	GO:0098656	anion transmembrane transport	6	0.0625	0.000306744	0.00233285
	GO:0010218	response to far red light	6	0.0625	0.000632491	0.00284956
	GO:0009809	lignin biosynthetic process	6	0.0625	0.001041	0.00345173
	GO:0016616	oxidoreductase activity, acting on the CH-OH group of donors, NAD or NADP as acceptor	6	0.0625	0.00111467	0.00354413
	GO:0010015	root morphogenesis	6	0.0625	0.00120562	0.00361071
C3	GO:0000281	mitotic cytokinesis	23	0.0532407	1.01719e-08	1.55502e-06
	GO:2000113	negative regulation of cellular macromolecule biosynthetic process	22	0.0509259	4.02598e-08	3.81005e-06
	GO:1902679	negative regulation of RNA biosynthetic process	20	0.0462963	3.97643e-08	3.81005e-06
	GO:0072686	mitotic spindle	20	0.0462963	6.00553e-08	4.59046e-06
	GO:1903507	negative regulation of nucleic acid-templated transcription	20	0.0462963	1.9899e-07	1.2757e-05
	GO:0006366	transcription by RNA polymerase II	20	0.0462963	2.56794e-07	1.5082e-05
	GO:0051253	negative regulation of RNA metabolic process	20	0.0462963	3.07099e-07	1.69533e-05
	GO:0097659	nucleic acid-templated transcription	16	0.037037	4.37668e-07	2.28897e-05
	GO:1990837	sequence-specific double-stranded DNA binding	20	0.0462963	8.51497e-07	3.74666e-05
	GO:0048585	negative regulation of response to stimulus	20	0.0462963	1.81207e-06	6.40938e-05
	GO:0043410	positive regulation of MAPK cascade	12	0.0277778	2.74041e-06	8.50969e-05
	GO:0007140	male meiotic nuclear division	11	0.025463	4.55843e-06	0.000122423
	GO:0010088	phloem development	11	0.025463	1.14049e-05	0.000209868
	GO:0009789	positive regulation of abscisic acid-activated signaling pathway	18	0.0416667	1.19255e-05	0.000215458
	GO:0000226	microtubule cytoskeleton organization	17	0.0393519	1.35102e-05	0.000239729
	GO:0010648	negative regulation of cell communication	14	0.0324074	1.65077e-05	0.000264572
	GO:0023057	negative regulation of signaling	14	0.0324074	1.65077e-05	0.000264572
	GO:1900424	regulation of defense response to bacterium	13	0.0300926	1.67058e-05	0.000265604
	GO:1902074	response to salt	14	0.0324074	2.51726e-05	0.000365163
	GO:0006338	chromatin remodeling	18	0.0416667	2.55666e-05	0.000368191
	GO:0032153	cell division site	16	0.037037	2.74213e-05	0.000386499
	GO:2000652	regulation of secondary cell wall biogenesis	14	0.0324074	3.52218e-05	0.000448408
	GO:0032270	positive regulation of cellular protein metabolic process	14	0.0324074	5.86565e-05	0.000625491
	GO:0071365	cellular response to auxin stimulus	14	0.0324074	7.7075e-05	0.000747202
	GO:0033365	protein localization to organelle	17	0.0393519	7.97465e-05	0.000769348
	GO:0051093	negative regulation of developmental process	12	0.0277778	9.66907e-05	0.000873455
	GO:0001650	fibrillar center	11	0.025463	0.000174275	0.0013744
	GO:0000775	chromosome, centromeric region	11	0.025463	0.000704191	0.00374364
	GO:0030234	enzyme regulator activity	14	0.0324074	0.000862123	0.00433761
	GO:0090558	plant epidermis development	14	0.0324074	0.000957656	0.00461946
	GO:0045595	regulation of cell differentiation	13	0.0300926	0.00294486	0.0104884
	GO:0048510	regulation of timing of transition from vegetative to reproductive phase	12	0.0277778	0.0035697	0.0122316
	GO:0010090	trichome morphogenesis	12	0.0277778	0.00399743	0.0132734
	GO:0003743	translation initiation factor activity	11	0.025463	0.00447689	0.0144202
	GO:0010051	xylem and phloem pattern formation	12	0.0277778	0.00679378	0.0176626
	GO:0009965	leaf morphogenesis	12	0.0277778	0.0104589	0.0224468
	GO:2000241	regulation of reproductive process	12	0.0277778	0.0117957	0.0235839
	GO:0010082	regulation of root meristem growth	11	0.025463	0.0242074	0.0346108
C4	GO:0010229	inflorescence development	12	0.0510638	1.36595e-07	8.10941e-05
	GO:0007096	regulation of exit from mitosis	6	0.0255319	9.5715e-08	8.10941e-05
	GO:2000904	regulation of starch metabolic process	6	0.0255319	5.859e-06	0.000681903
	GO:0071486	cellular response to high light intensity	6	0.0255319	6.3583e-06	0.000681903
	GO:0009690	cytokinin metabolic process	6	0.0255319	6.89158e-06	0.000681903
	GO:0009880	embryonic pattern specification	8	0.0340426	3.03302e-05	0.00211842
	GO:0010051	xylem and phloem pattern formation	12	0.0510638	3.29536e-05	0.00217378
	GO:1990837	sequence-specific double-stranded DNA binding	12	0.0510638	5.20248e-05	0.00229657
	GO:2000022	regulation of jasmonic acid mediated signaling pathway	12	0.0510638	5.41567e-05	0.00229657
	GO:0031399	regulation of protein modification process	10	0.0425532	5.30077e-05	0.00229657
	GO:0010192	mucilage biosynthetic process	8	0.0340426	4.83696e-05	0.00229657
	GO:0030332	cyclin binding	7	0.0297872	5.26235e-05	0.00229657
	GO:0051248	negative regulation of protein metabolic process	8	0.0340426	0.000101971	0.00377472
	GO:1901332	negative regulation of lateral root development	6	0.0255319	0.00017197	0.00486172
	GO:0001650	fibrillar center	8	0.0340426	0.00019745	0.00532832
	GO:2000762	regulation of phenylpropanoid metabolic process	8	0.0340426	0.000219844	0.00562657
	GO:0010099	regulation of photomorphogenesis	6	0.0255319	0.000387579	0.00807368
	GO:2000028	regulation of photoperiodism, flowering	9	0.0382979	0.000512165	0.00907654
	GO:0031348	negative regulation of defense response	10	0.0425532	0.000537901	0.0091241
	GO:0048573	photoperiodism, flowering	10	0.0425532	0.000596536	0.00933468
	GO:0030234	enzyme regulator activity	10	0.0425532	0.000617218	0.00951774
	GO:0016036	cellular response to phosphate starvation	10	0.0425532	0.000900779	0.0120206
	GO:0034765	regulation of ion transmembrane transport	6	0.0255319	0.00109728	0.0141616
	GO:2000070	regulation of response to water deprivation	6	0.0255319	0.00112841	0.0144069
	GO:0032153	cell division site	9	0.0382979	0.0012285	0.0151946
	GO:0000987	proximal promoter sequence-specific DNA binding	8	0.0340426	0.00150248	0.015344
	GO:0048507	meristem development	8	0.0340426	0.00161632	0.015344
	GO:0090575	RNA polymerase II transcription factor complex	8	0.0340426	0.00167575	0.015344
	GO:0043410	positive regulation of MAPK cascade	6	0.0255319	0.00140257	0.015344
	GO:0048586	regulation of long-day photoperiodism, flowering	6	0.0255319	0.00159802	0.015344
	GO:0045926	negative regulation of growth	6	0.0255319	0.00190564	0.015344
	GO:0010105	negative regulation of ethylene-activated signaling pathway	6	0.0255319	0.00296724	0.0169659
	GO:0048638	regulation of developmental growth	6	0.0255319	0.00345271	0.0172254
	GO:0043069	negative regulation of programmed cell death	6	0.0255319	0.00360167	0.0178188
	GO:0009625	response to insect	8	0.0340426	0.00370075	0.0181202
	GO:0048579	negative regulation of long-day photoperiodism, flowering	6	0.0255319	0.00407726	0.0186211
	GO:0000226	microtubule cytoskeleton organization	8	0.0340426	0.00618611	0.0212768
	GO:0000165	MAPK cascade	6	0.0255319	0.00611191	0.0212768
	GO:0010103	stomatal complex morphogenesis	6	0.0255319	0.00633823	0.0214411
	GO:0010015	root morphogenesis	8	0.0340426	0.00886804	0.02693
	GO:1905393	plant organ formation	6	0.0255319	0.00894818	0.0269685
	GO:0003743	translation initiation factor activity	7	0.0297872	0.00975225	0.0281078
	GO:0009965	leaf morphogenesis	8	0.0340426	0.0112589	0.0304925
	GO:0080022	primary root development	6	0.0255319	0.0117074	0.0307543
	GO:0030001	metal ion transport	8	0.0340426	0.0121988	0.0318341
	GO:0008134	transcription factor binding	6	0.0255319	0.0128104	0.0327816
	GO:0010345	suberin biosynthetic process	6	0.0255319	0.0150185	0.0356715
	GO:0048868	pollen tube development	6	0.0255319	0.0163282	0.0372838
	GO:1900425	negative regulation of defense response to bacterium	6	0.0255319	0.0167817	0.0380404
	GO:0005667	transcription factor complex	7	0.0297872	0.0178272	0.0391704
	GO:0009863	salicylic acid mediated signaling pathway	6	0.0255319	0.0232005	0.0445034
	GO:1900140	regulation of seedling development	6	0.0255319	0.0246575	0.046252
	GO:0090351	seedling development	6	0.0255319	0.0274318	0.0492763
	GO:0009640	photomorphogenesis	6	0.0255319	0.0277522	0.0496267
	GO:0080050	regulation of seed development	5	0.0212766	0.00304907	0.0171784
C5	GO:0071368	cellular response to cytokinin stimulus	10	0.0641026	3.96988e-09	2.8416e-06
	GO:2000488	positive regulation of brassinosteroid biosynthetic process	6	0.0384615	1.38731e-08	4.96512e-06
	GO:0010601	positive regulation of auxin biosynthetic process	6	0.0384615	1.70131e-06	0.000248295
	GO:0071365	cellular response to auxin stimulus	10	0.0641026	2.67753e-06	0.000258853
	GO:0048440	carpel development	8	0.0512821	8.6751e-06	0.000344975
	GO:2000762	regulation of phenylpropanoid metabolic process	8	0.0512821	1.23195e-05	0.000419912
	GO:0048438	floral whorl development	8	0.0512821	1.86147e-05	0.000579313
	GO:0051093	negative regulation of developmental process	8	0.0512821	2.17963e-05	0.000624064
	GO:0010091	trichome branching	9	0.0576923	2.34992e-05	0.000646941
	GO:2000241	regulation of reproductive process	10	0.0641026	4.10131e-05	0.000917399
	GO:0048443	stamen development	8	0.0512821	4.04073e-05	0.000917399
	GO:0010093	specification of floral organ identity	6	0.0384615	4.47504e-05	0.000949304
	GO:0048766	root hair initiation	6	0.0384615	4.64181e-05	0.000949304
	GO:0048444	floral organ morphogenesis	6	0.0384615	4.99029e-05	0.000965404
	GO:0006470	protein dephosphorylation	8	0.0512821	6.49145e-05	0.00108058
	GO:0048657	anther wall tapetum cell differentiation	6	0.0384615	7.30002e-05	0.00116117
	GO:0048574	long-day photoperiodism, flowering	6	0.0384615	0.00021886	0.00265521
	GO:0045926	negative regulation of growth	6	0.0384615	0.000224725	0.00268094
	GO:0009736	cytokinin-activated signaling pathway	8	0.0512821	0.000338046	0.00361149
	GO:0048510	regulation of timing of transition from vegetative to reproductive phase	8	0.0512821	0.000378311	0.00395692
	GO:0005543	phospholipid binding	7	0.0448718	0.000381435	0.00395692
	GO:0007346	regulation of mitotic cell cycle	7	0.0448718	0.000558984	0.00540696
	GO:0009965	leaf morphogenesis	8	0.0512821	0.000947231	0.00574591
	GO:0090698	post-embryonic plant morphogenesis	6	0.0384615	0.00102103	0.00587889
	GO:0048585	negative regulation of response to stimulus	8	0.0512821	0.00121314	0.00633834
	GO:1905393	plant organ formation	6	0.0384615	0.00120612	0.00633834
	GO:0023057	negative regulation of signaling	6	0.0384615	0.00191784	0.00755178
	GO:0010090	trichome morphogenesis	7	0.0448718	0.00204054	0.00768736
	GO:0071472	cellular response to salt stress	6	0.0384615	0.00211195	0.00769847
	GO:0032774	RNA biosynthetic process	6	0.0384615	0.00217983	0.00769847
	GO:0009938	negative regulation of gibberellic acid mediated signaling pathway	6	0.0384615	0.00232054	0.00783898
	GO:0009642	response to light intensity	6	0.0384615	0.00282543	0.00839174
	GO:0009968	negative regulation of signal transduction	6	0.0384615	0.00282543	0.00839174
	GO:2000028	regulation of photoperiodism, flowering	6	0.0384615	0.00424391	0.0107721
	GO:0009640	photomorphogenesis	6	0.0384615	0.00430071	0.0108014
	GO:0010286	heat acclimation	6	0.0384615	0.00792416	0.0149264
	GO:0060548	negative regulation of cell death	6	0.0384615	0.00847263	0.0155105
	GO:2000377	regulation of reactive oxygen species metabolic process	6	0.0384615	0.00944658	0.0166546
	GO:1903507	negative regulation of nucleic acid-templated transcription	6	0.0384615	0.00975374	0.0170568
	GO:0010118	stomatal movement	6	0.0384615	0.0102814	0.0175222
	GO:0006366	transcription by RNA polymerase II	6	0.0384615	0.0104981	0.0176394
	GO:0090558	plant epidermis development	6	0.0384615	0.0124723	0.0199276
	GO:1990837	sequence-specific double-stranded DNA binding	6	0.0384615	0.0148332	0.0216682
	GO:0010584	pollen exine formation	6	0.0384615	0.01642	0.0229462
C6	GO:0006006	glucose metabolic process	8	0.0337553	3.91929e-06	0.000325695
	GO:0044262	cellular carbohydrate metabolic process	12	0.0506329	6.46141e-06	0.000369967
	GO:0009825	multidimensional cell growth	12	0.0506329	7.56373e-06	0.00038286
	GO:0005976	polysaccharide metabolic process	10	0.0421941	3.03184e-05	0.00100848
	GO:0034637	cellular carbohydrate biosynthetic process	8	0.0337553	4.62485e-05	0.00142355
	GO:0010192	mucilage biosynthetic process	8	0.0337553	5.13388e-05	0.00145779
	GO:0051091	positive regulation of DNA-binding transcription factor activity	8	0.0337553	9.86186e-05	0.00220794
	GO:0009832	plant-type cell wall biogenesis	10	0.0421941	0.000238926	0.00375892
	GO:0009939	positive regulation of gibberellic acid mediated signaling pathway	6	0.0253165	0.000326028	0.00474457
	GO:0007059	chromosome segregation	9	0.0379747	0.000410073	0.00560579
	GO:0048766	root hair initiation	6	0.0253165	0.000450301	0.00576094
	GO:0010118	stomatal movement	10	0.0421941	0.000517119	0.0062712
	GO:1900057	positive regulation of leaf senescence	8	0.0337553	0.000614217	0.0069425
	GO:0006650	glycerophospholipid metabolic process	6	0.0253165	0.000807365	0.00824511
	GO:0098660	inorganic ion transmembrane transport	10	0.0421941	0.00103916	0.00999833
	GO:1901002	positive regulation of response to salt stress	9	0.0379747	0.00161263	0.0116967
	GO:0010047	fruit dehiscence	6	0.0253165	0.00193991	0.0124378
	GO:0016311	dephosphorylation	8	0.0337553	0.00360817	0.0137213
	GO:1902679	negative regulation of RNA biosynthetic process	8	0.0337553	0.00366394	0.0137213
	GO:0046486	glycerolipid metabolic process	6	0.0253165	0.00383264	0.0137213
	GO:2000762	regulation of phenylpropanoid metabolic process	6	0.0253165	0.00580105	0.0168841
	GO:0006644	phospholipid metabolic process	6	0.0253165	0.00746913	0.018831
	GO:0042752	regulation of circadian rhythm	7	0.0295359	0.0107516	0.0232542
	GO:2000022	regulation of jasmonic acid mediated signaling pathway	8	0.0337553	0.0113989	0.0241725
	GO:0016791	phosphatase activity	8	0.0337553	0.0119387	0.0247315
	GO:0030001	metal ion transport	8	0.0337553	0.0127833	0.0256595
	GO:0009625	response to insect	7	0.0295359	0.0134175	0.0265065
	GO:0007584	response to nutrient	6	0.0253165	0.0147345	0.0275788
	GO:0048510	regulation of timing of transition from vegetative to reproductive phase	7	0.0295359	0.0173284	0.0306092
	GO:0006302	double-strand break repair	6	0.0253165	0.0196432	0.0330475
	GO:0046873	metal ion transmembrane transporter activity	6	0.0253165	0.0206905	0.0340641
	GO:0071365	cellular response to auxin stimulus	6	0.0253165	0.0261829	0.0401085
	GO:0010091	trichome branching	6	0.0253165	0.02876	0.0425441
	GO:0080147	root hair cell development	6	0.0253165	0.0332945	0.0460354
C7	GO:0060589	nucleoside-triphosphatase regulator activity	8	0.0540541	4.04078e-08	1.80346e-05
	GO:0032879	regulation of localization	12	0.0810811	2.11713e-07	2.74569e-05
	GO:0043085	positive regulation of catalytic activity	10	0.0675676	2.78528e-06	0.000138124
	GO:0044093	positive regulation of molecular function	10	0.0675676	6.45072e-06	0.000261733
	GO:0051336	regulation of hydrolase activity	8	0.0540541	1.53714e-05	0.000457367
	GO:0007346	regulation of mitotic cell cycle	6	0.0405405	0.000231759	0.00361126
	GO:0030234	enzyme regulator activity	8	0.0540541	0.000365167	0.00487988
	GO:1902679	negative regulation of RNA biosynthetic process	8	0.0540541	0.000371745	0.00487988
	GO:0051726	regulation of cell cycle	8	0.0540541	0.000589388	0.00665019
	GO:0051253	negative regulation of RNA metabolic process	8	0.0540541	0.000913908	0.00759878
	GO:0010558	negative regulation of macromolecule biosynthetic process	8	0.0540541	0.00181507	0.00759878
	GO:0031347	regulation of defense response	7	0.0472973	0.0016695	0.00759878
	GO:0008289	lipid binding	6	0.0405405	0.00687624	0.0142785
	GO:0060560	developmental growth involved in morphogenesis	6	0.0405405	0.00842789	0.0162032
	GO:0045892	negative regulation of transcription, DNA-templated	6	0.0405405	0.0117247	0.0201217
	GO:2000113	negative regulation of cellular macromolecule biosynthetic process	6	0.0405405	0.0177045	0.0255721
	GO:0048589	developmental growth	6	0.0405405	0.0195231	0.0270604
	GO:0005856	cytoskeleton	6	0.0405405	0.0261902	0.0315823
C8	GO:0042176	regulation of protein catabolic process	6	0.0359281	2.49273e-05	0.00528721
	GO:0009736	cytokinin-activated signaling pathway	6	0.0359281	4.92385e-05	0.00696249
	GO:0071396	cellular response to lipid	8	0.0479042	0.000566034	0.015641
	GO:1901137	carbohydrate derivative biosynthetic process	8	0.0479042	0.000962119	0.015641
	GO:0098660	inorganic ion transmembrane transport	8	0.0479042	0.00191587	0.015641
	GO:0071215	cellular response to abscisic acid stimulus	6	0.0359281	0.000650401	0.015641
	GO:0010941	regulation of cell death	6	0.0359281	0.000861654	0.015641
	GO:0044432	endoplasmic reticulum part	8	0.0479042	0.00247392	0.015901
	GO:0031668	cellular response to extracellular stimulus	6	0.0359281	0.00629269	0.0193437
	GO:0071496	cellular response to external stimulus	6	0.0359281	0.00795566	0.0220506
	GO:0090558	plant epidermis development	6	0.0359281	0.00978264	0.0248497
	GO:0031347	regulation of defense response	6	0.0359281	0.0129769	0.028338
	GO:0009991	response to extracellular stimulus	6	0.0359281	0.0131375	0.0284341
	GO:0048831	regulation of shoot system development	6	0.0359281	0.0148212	0.0308202
	GO:0009505	plant-type cell wall	6	0.0359281	0.0153543	0.0312253
	GO:0022804	active transmembrane transporter activity	6	0.0359281	0.0188347	0.0363397
C9	GO:0009414	response to water deprivation	20	0.0514139	2.35033e-06	0.00081478
	GO:0008017	microtubule binding	14	0.0359897	7.08152e-06	0.00122746
	GO:0010228	vegetative to reproductive phase transition of meristem	12	0.0308483	2.41222e-05	0.00192977
	GO:0048573	photoperiodism, flowering	8	0.0205656	3.51956e-05	0.00235515
	GO:1901265	nucleoside phosphate binding	16	0.0411311	9.12445e-05	0.00338908
	GO:0048437	floral organ development	14	0.0359897	8.8942e-05	0.00338908
	GO:0010074	maintenance of meristem identity	6	0.0154242	0.000186892	0.00555336
	GO:1905392	plant organ morphogenesis	16	0.0411311	0.000323764	0.00863371
	GO:0005856	cytoskeleton	16	0.0411311	0.000354583	0.00899429
	GO:0009867	jasmonic acid mediated signaling pathway	8	0.0205656	0.000477218	0.011029
	GO:0048609	multicellular organismal reproductive process	11	0.0282776	0.000560141	0.0121364
	GO:0048466	androecium development	8	0.0205656	0.000648989	0.0122718
	GO:0048444	floral organ morphogenesis	6	0.0154242	0.000627517	0.0122718
	GO:0016791	phosphatase activity	14	0.0359897	0.000787993	0.0141295
	GO:0030258	lipid modification	8	0.0205656	0.000939697	0.0145316
	GO:0006470	protein dephosphorylation	8	0.0205656	0.000977564	0.0145316
	GO:0009753	response to jasmonic acid	12	0.0308483	0.00122999	0.0159899
	GO:0000910	cytokinesis	8	0.0205656	0.00127815	0.0164108
	GO:0019757	glycosinolate metabolic process	6	0.0154242	0.00132275	0.0165742
	GO:0090698	post-embryonic plant morphogenesis	10	0.0257069	0.00147723	0.0176589
	GO:0045892	negative regulation of transcription, DNA-templated	13	0.033419	0.00153889	0.0181868
	GO:0048438	floral whorl development	10	0.0257069	0.00179644	0.0203076
	GO:0033218	amide binding	6	0.0154242	0.00217206	0.023288
	GO:1902679	negative regulation of RNA biosynthetic process	12	0.0308483	0.00230243	0.0234757
	GO:1903507	negative regulation of nucleic acid-templated transcription	12	0.0308483	0.00230243	0.0234757
	GO:0071215	cellular response to abscisic acid stimulus	8	0.0205656	0.00318528	0.0290587
	GO:0009723	response to ethylene	11	0.0282776	0.0045594	0.0379342
	GO:1903047	mitotic cell cycle process	10	0.0257069	0.0057828	0.038558
	GO:0009738	abscisic acid-activated signaling pathway	8	0.0205656	0.00521562	0.038558
	GO:0090626	plant epidermis morphogenesis	6	0.0154242	0.00582797	0.038558
	GO:0010119	regulation of stomatal movement	6	0.0154242	0.00604199	0.038558
	GO:0051253	negative regulation of RNA metabolic process	12	0.0308483	0.00682441	0.0401362
	GO:0090558	plant epidermis development	10	0.0257069	0.0101966	0.0426527
	GO:0071396	cellular response to lipid	10	0.0257069	0.0118367	0.0433585
	GO:0010558	negative regulation of macromolecule biosynthetic process	12	0.0308483	0.0151215	0.0489818
C10	GO:1905428	regulation of plant organ formation	6	0.0461538	1.45097e-08	5.33041e-06
	GO:0040034	regulation of development, heterochronic	6	0.0461538	8.28839e-06	0.000507482
	GO:0048581	negative regulation of post-embryonic development	6	0.0461538	7.90116e-05	0.00353587
	GO:0032268	regulation of cellular protein metabolic process	10	0.0769231	0.000125726	0.00363135
	GO:0043067	regulation of programmed cell death	6	0.0461538	0.000138387	0.00363135
	GO:0031329	regulation of cellular catabolic process	6	0.0461538	0.000400454	0.0054872
	GO:0051241	negative regulation of multicellular organismal process	6	0.0461538	0.000504801	0.00598219
	GO:0051093	negative regulation of developmental process	6	0.0461538	0.000888003	0.00716033
	GO:0044432	endoplasmic reticulum part	8	0.0615385	0.00145021	0.00719947
	GO:0009723	response to ethylene	6	0.0461538	0.00370715	0.00939233
	GO:0009734	auxin-activated signaling pathway	6	0.0461538	0.00618445	0.0116387
	GO:0019748	secondary metabolic process	6	0.0461538	0.00901054	0.0140859
	GO:2000113	negative regulation of cellular macromolecule biosynthetic process	6	0.0461538	0.0126611	0.0168525
	GO:0048585	negative regulation of response to stimulus	6	0.0461538	0.0147512	0.0184324
	GO:0010558	negative regulation of macromolecule biosynthetic process	6	0.0461538	0.0186881	0.0215217
	GO:0031327	negative regulation of cellular biosynthetic process	6	0.0461538	0.0224413	0.0240508
	GO:0043632	modification-dependent macromolecule catabolic process	6	0.0461538	0.0226519	0.0240508
	GO:0050832	defense response to fungus	6	0.0461538	0.0266737	0.0272955
C11	GO:0006790	sulfur compound metabolic process	12	0.0612245	4.33529e-06	0.000723309
	GO:0006766	vitamin metabolic process	6	0.0306122	1.51332e-05	0.00126243
	GO:0034655	nucleobase-containing compound catabolic process	8	0.0408163	8.08318e-05	0.00486548
	GO:0044272	sulfur compound biosynthetic process	6	0.0306122	0.000148709	0.00661625
	GO:0044270	cellular nitrogen compound catabolic process	8	0.0408163	0.000252283	0.00963244
	GO:0046700	heterocycle catabolic process	8	0.0408163	0.000259802	0.00963244
	GO:0009968	negative regulation of signal transduction	8	0.0408163	0.000407315	0.0133506
	GO:0010648	negative regulation of cell communication	8	0.0408163	0.000441372	0.0133506
	GO:0019439	aromatic compound catabolic process	8	0.0408163	0.000543633	0.0133506
	GO:0006401	RNA catabolic process	6	0.0306122	0.000481513	0.0133506
	GO:0040008	regulation of growth	8	0.0408163	0.00169948	0.0276432
	GO:0009734	auxin-activated signaling pathway	8	0.0408163	0.00353932	0.0333862
	GO:0009555	pollen development	8	0.0408163	0.00925608	0.0423097
	GO:0048585	negative regulation of response to stimulus	8	0.0408163	0.0106038	0.0430894
	GO:0048589	developmental growth	8	0.0408163	0.0106038	0.0430894
	GO:0042546	cell wall biogenesis	6	0.0306122	0.0136745	0.0493292
C12	GO:0042866	pyruvate biosynthetic process	6	0.030303	5.49603e-07	2.20731e-05
	GO:0009166	nucleotide catabolic process	6	0.030303	3.12828e-06	5.63204e-05
	GO:0090696	post-embryonic plant organ development	10	0.0505051	6.13911e-06	8.21861e-05
	GO:0048527	lateral root development	8	0.040404	6.4131e-06	8.37078e-05
	GO:0016052	carbohydrate catabolic process	8	0.040404	8.38402e-06	0.000106764
	GO:0098796	membrane protein complex	12	0.0606061	3.40828e-05	0.000324593
	GO:0072521	purine-containing compound metabolic process	8	0.040404	8.07115e-05	0.000658436
	GO:0016053	organic acid biosynthetic process	12	0.0606061	0.000129732	0.000980422
	GO:0044262	cellular carbohydrate metabolic process	10	0.0505051	0.000183676	0.00124543
	GO:1901137	carbohydrate derivative biosynthetic process	10	0.0505051	0.000237386	0.00153009
	GO:0044550	secondary metabolite biosynthetic process	8	0.040404	0.000412801	0.0024773
	GO:0016051	carbohydrate biosynthetic process	8	0.040404	0.000745299	0.0040116
	GO:0010087	phloem or xylem histogenesis	6	0.030303	0.000760295	0.00405055
	GO:0010015	root morphogenesis	8	0.040404	0.00121164	0.0059122
	GO:0048509	regulation of meristem development	6	0.030303	0.00173781	0.0079382
	GO:1905392	plant organ morphogenesis	10	0.0505051	0.00186439	0.00839145
	GO:0009814	defense response, incompatible interaction	7	0.0353535	0.0024318	0.00980955
	GO:0061630	ubiquitin protein ligase activity	10	0.0505051	0.00340153	0.0111695
	GO:0019748	secondary metabolic process	8	0.040404	0.00605251	0.0150478
	GO:0019439	aromatic compound catabolic process	6	0.030303	0.0110777	0.0206562
	GO:0048831	regulation of shoot system development	6	0.030303	0.0305119	0.0383026
	GO:0009734	auxin-activated signaling pathway	6	0.030303	0.0399813	0.0460174
C13	GO:0010118	stomatal movement	15	0.0675676	6.62146e-08	2.59747e-05
	GO:1902066	regulation of cell wall pectin metabolic process	7	0.0315315	1.15738e-06	0.000136205
	GO:0010439	regulation of glucosinolate biosynthetic process	7	0.0315315	3.48413e-06	0.000245597
	GO:0071669	plant-type cell wall organization or biogenesis	12	0.0540541	5.16703e-06	0.000264382
	GO:1901137	carbohydrate derivative biosynthetic process	12	0.0540541	1.32004e-05	0.000517827
	GO:1901293	nucleoside phosphate biosynthetic process	8	0.036036	2.91118e-05	0.000906362
	GO:0048638	regulation of developmental growth	8	0.036036	7.52584e-05	0.00168722
	GO:0071368	cellular response to cytokinin stimulus	7	0.0315315	9.2674e-05	0.00188039
	GO:0009152	purine ribonucleotide biosynthetic process	6	0.027027	9.71517e-05	0.00189508
	GO:0080113	regulation of seed growth	7	0.0315315	0.000174849	0.0027993
	GO:0045787	positive regulation of cell cycle	7	0.0315315	0.000186142	0.00292079
	GO:0051174	regulation of phosphorus metabolic process	8	0.036036	0.000249535	0.003704
	GO:0055086	nucleobase-containing small molecule metabolic process	10	0.045045	0.00026259	0.00381514
	GO:0009808	lignin metabolic process	6	0.027027	0.000266403	0.00382335
	GO:0010227	floral organ abscission	8	0.036036	0.000381648	0.00493559
	GO:0016036	cellular response to phosphate starvation	10	0.045045	0.000582374	0.00665401
	GO:2000022	regulation of jasmonic acid mediated signaling pathway	10	0.045045	0.000601502	0.00680647
	GO:0009965	leaf morphogenesis	10	0.045045	0.000631166	0.00704331
	GO:0009625	response to insect	9	0.0405405	0.000634401	0.00704331
	GO:0031399	regulation of protein modification process	8	0.036036	0.000882262	0.00918835
	GO:0009991	response to extracellular stimulus	8	0.036036	0.00175098	0.0129532
	GO:0009117	nucleotide metabolic process	8	0.036036	0.0018107	0.0129532
	GO:0010105	negative regulation of ethylene-activated signaling pathway	6	0.027027	0.00223854	0.0130509
	GO:0046034	ATP metabolic process	6	0.027027	0.00239248	0.0133928
	GO:0009664	plant-type cell wall organization	9	0.0405405	0.00293414	0.0136631
	GO:0001932	regulation of protein phosphorylation	6	0.027027	0.00284197	0.0136631
	GO:0072521	purine-containing compound metabolic process	6	0.027027	0.00284197	0.0136631
	GO:0009736	cytokinin-activated signaling pathway	8	0.036036	0.00323617	0.0143175
	GO:0048510	regulation of timing of transition from vegetative to reproductive phase	8	0.036036	0.00358376	0.0146952
	GO:1901001	negative regulation of response to salt stress	6	0.027027	0.00400378	0.0152981
	GO:0048509	regulation of meristem development	6	0.027027	0.00519822	0.016993
	GO:0006631	fatty acid metabolic process	8	0.036036	0.00897031	0.0215003
	GO:2000241	regulation of reproductive process	8	0.036036	0.00897031	0.0215003
	GO:0071496	cellular response to external stimulus	6	0.027027	0.0119644	0.0250998
	GO:0009938	negative regulation of gibberellic acid mediated signaling pathway	6	0.027027	0.0124844	0.02611
	GO:0048868	pollen tube development	6	0.027027	0.0126612	0.02611
	GO:0048507	meristem development	6	0.027027	0.0174489	0.0313051
	GO:0048573	photoperiodism, flowering	7	0.0315315	0.0182578	0.0317698
	GO:0051247	positive regulation of protein metabolic process	6	0.027027	0.021003	0.0350102
	GO:0009640	photomorphogenesis	6	0.027027	0.0217684	0.0357295
	GO:0006633	fatty acid biosynthetic process	7	0.0315315	0.0274247	0.0408418
	GO:0009832	plant-type cell wall biogenesis	6	0.027027	0.0314563	0.0451389
C14	GO:0048366	leaf development	15	0.0503356	0.000109886	0.0162074
	GO:0009685	gibberellin metabolic process	6	0.0201342	0.000166633	0.0190438
	GO:0006470	protein dephosphorylation	8	0.0268456	0.000254124	0.0203299
	GO:0016101	diterpenoid metabolic process	6	0.0201342	0.000423751	0.0229244
	GO:0071229	cellular response to acid chemical	14	0.0469799	0.000667277	0.0280959
	GO:0048507	meristem development	10	0.033557	0.000854767	0.0310824
	GO:0061630	ubiquitin protein ligase activity	14	0.0469799	0.00116183	0.0357486
	GO:2000241	regulation of reproductive process	12	0.0402685	0.00215427	0.0465232
	GO:0016053	organic acid biosynthetic process	12	0.0402685	0.00448912	0.0465232
	GO:0005516	calmodulin binding	10	0.033557	0.00240834	0.0465232
	GO:0033043	regulation of organelle organization	10	0.033557	0.00257867	0.0465232
	GO:0071396	cellular response to lipid	10	0.033557	0.00328756	0.0465232
	GO:0009734	auxin-activated signaling pathway	10	0.033557	0.00477411	0.0465232
	GO:1901137	carbohydrate derivative biosynthetic process	10	0.033557	0.0050664	0.0465232
	GO:0005874	microtubule	9	0.0302013	0.00515947	0.0465232
	GO:0033044	regulation of chromosome organization	6	0.0201342	0.00584374	0.0465232
	GO:0006351	transcription, DNA-templated	10	0.033557	0.00867339	0.0485225
	GO:0010228	vegetative to reproductive phase transition of meristem	7	0.0234899	0.00909828	0.0492803
C15	GO:0000976	transcription regulatory region sequence-specific DNA binding	16	0.0608365	3.39851e-06	0.00119663
	GO:0090567	reproductive shoot system development	14	0.0532319	0.000156031	0.00784848
	GO:0016791	phosphatase activity	12	0.0456274	0.000176892	0.00830462
	GO:0009908	flower development	14	0.0532319	0.000194613	0.00856555
	GO:0044448	cell cortex part	6	0.0228137	0.000245704	0.00910672
	GO:0009735	response to cytokinin	10	0.0380228	0.0002803	0.00939954
	GO:0010016	shoot system morphogenesis	8	0.0304183	0.00090173	0.0192427
	GO:0022412	cellular process involved in reproduction in multicellular organism	6	0.0228137	0.00121529	0.0231304
	GO:0048438	floral whorl development	8	0.0304183	0.00201444	0.0345998
	GO:0090698	post-embryonic plant morphogenesis	8	0.0304183	0.00229499	0.03848
	GO:0016311	dephosphorylation	8	0.0304183	0.00521527	0.0454293
	GO:0000902	cell morphogenesis	10	0.0380228	0.00929699	0.0479938
	GO:0042578	phosphoric ester hydrolase activity	8	0.0304183	0.0103771	0.0483951
	GO:0051248	negative regulation of protein metabolic process	6	0.0228137	0.0109495	0.0485111

[truncated: 1 more sheets: Supp Table 11]
